# Supplementary material for: Identifying determinants of bacterial fitness in a model of human gut microbial succession
Source: PubMed Central journal article supplement — Proc Natl Acad Sci U S A. 2020 Jan 22;117(5):2622–33. doi: 10.1073/pnas.1918951117 (PMC7007522; doi:10.1073/pnas.1918951117), 2020-01-22
Supplement: pnas.1918951117.sapp.pdf [file pnas.1918951117.sapp.pdf]

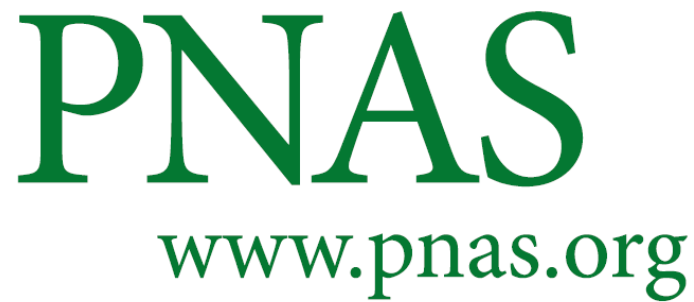

## Supplementary Information for

### **Identifying determinants of bacterial fitness in a model of human gut microbial succession**

Lihui Feng, Arjun S. Raman, Matthew C. Hibberd, Jiye Cheng, Nicholas W. Griffin, Yangqing Peng, Semen A. Leyn, Dmitry A. Rodionov, Andrei L. Osterman, and Jeffrey I. Gordon

Email: [jgordon@wustl.edu](mailto:jgordon@wustl.edu)

#### **This PDF file includes:**

Figs. S1 to S6  
Captions for databases S1 to S13

#### **Other supplementary materials for this manuscript include the following:**

Datasets S1 to S13

#### **Supplemental Figures**

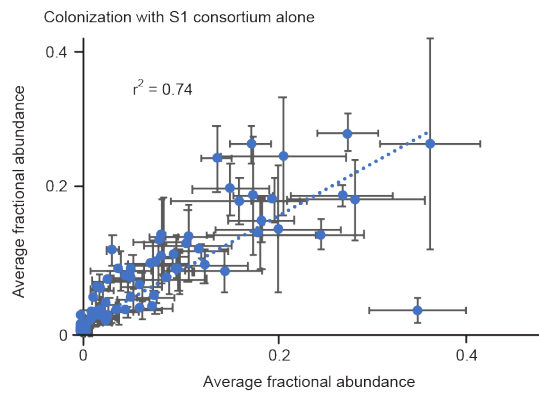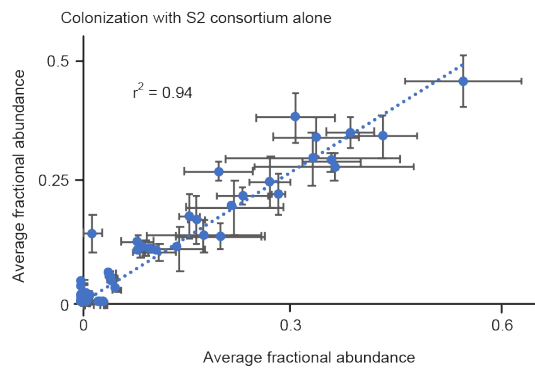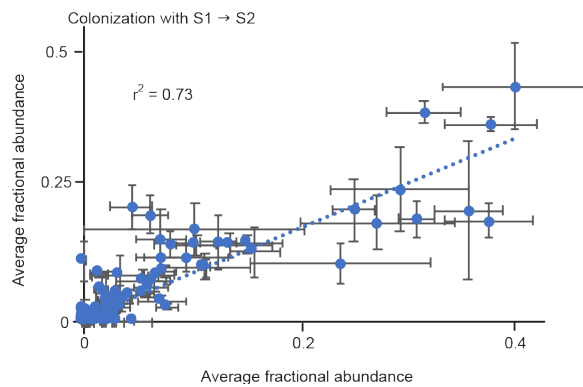

**Fig. S1 – Average fractional abundance of organisms is reproducible over two independent colonization experiments where animals were colonized with S1 alone, S2 alone and S1→S2.**

The x-axis plots data from the experiments shown in **Fig. 1** while the y-axis plots data obtained from an independent series of experiments whose results are presented in **Dataset S3B**. The closed circle and associated horizontal and vertical lines represent the mean fractional abundance  $\pm$  SD of a given organism in a given colonization condition. Pearson correlation values are shown.

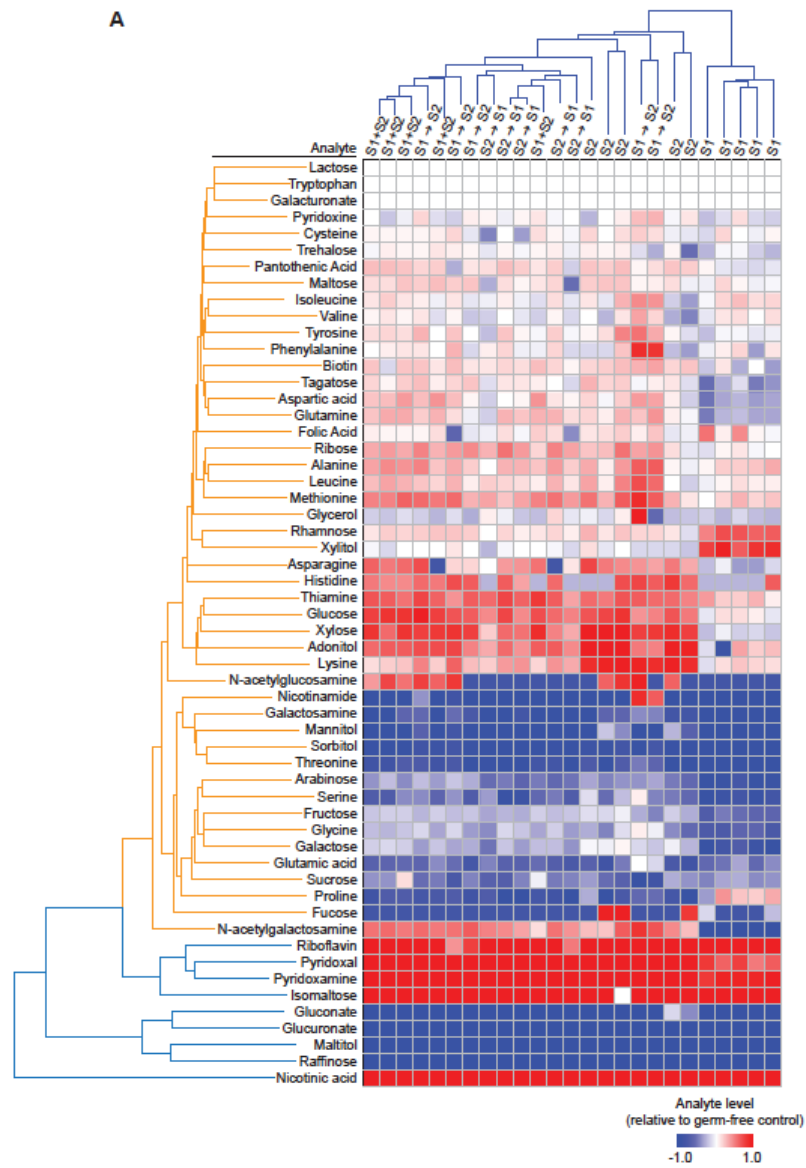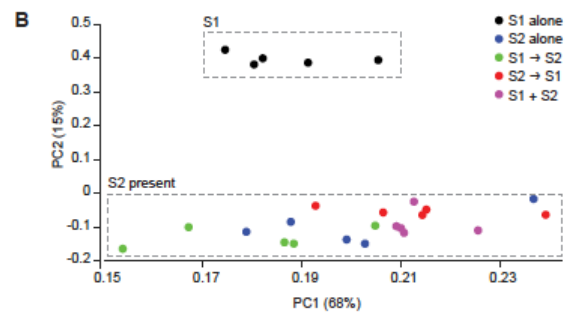

**Fig. S2 – Cecal analytes measured in mice subjected to different colonization histories. (A)**

Mass spectrometry of the concentrations of 27 carbohydrates, 19 amino acids and 10 vitamins/cofactors in cecal contents recovered from mice subjected to each of the colonization sequences tested, as well as from germ-free controls (see **Dataset S4A,B**). The extent to which an analyte was increased or decreased in the cecum for a particular colonization condition relative to germ-free controls was calculated for all analytes and the results are shown in the form of a heatmap (average values displayed, see **Dataset S4C** for data from individual animals). Hierarchical clustering reveals nine analytes whose relative levels are not dependent upon colonization conditions (blue components of the dendrogram representing cluster 1). **(B)** PCA was performed on the 47 analytes whose levels are dependent on colonization sequence (orange color components of dendrogram in panel A comprising cluster 2). Plotting the pattern of relative levels of analytes in cluster 2 in a given mouse subjected to a given colonization sequence shows that the metabolite landscape of animals colonized with S2 consortium members is distinct from that produced by colonization with the S1 consortium alone (see **Dataset S4D**).

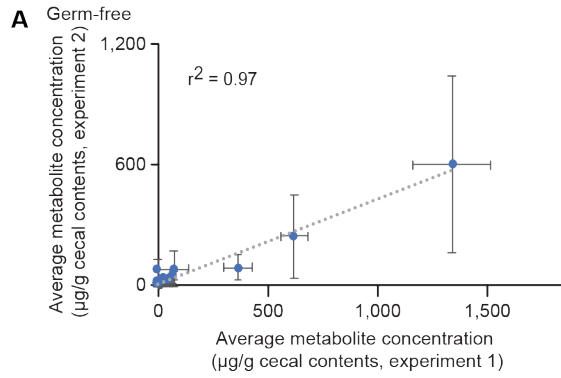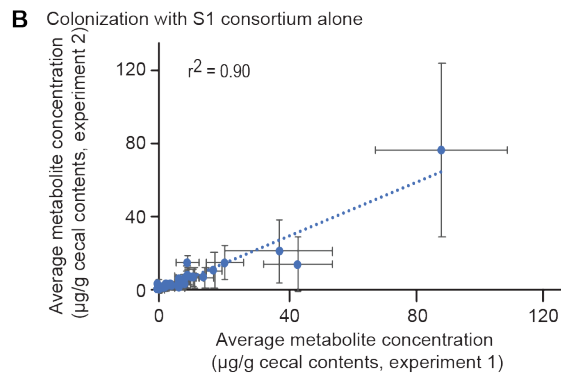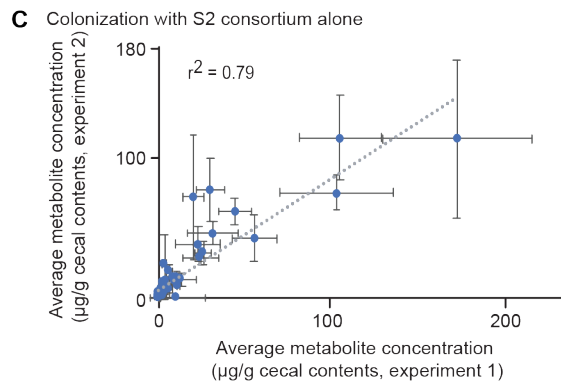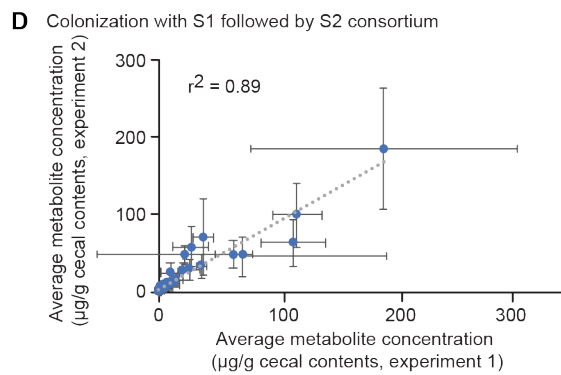

**Fig. S3 - Cecal analyte concentrations in gnotobiotic mice with different colonization histories.** (A-D) Average analyte concentrations, measured by targeted mass spectrometry in cecal contents harvested from germ-free mice (panel A), and mice colonized with the S1 consortium alone (panel B), the S2 consortium alone (panel C), or the S1 followed by the S2 consortium (panel D), are reproducible over two separate experiments. The closed circles and associated horizontal and vertical lines represent mean concentration  $\pm$  SD of a given analyte in a given colonization condition. Pearson correlation values are shown.



**Fig. S4 – Binary Phenotype Matrix (BPM) encompassing the 34 organisms studied.** Red cells indicate the presence of a complete biosynthetic pathway for an amino acid or a vitamin/cofactor/essential nutrient (prototrophy), or a carbohydrate utilization pathway (utilizer), or a SCFA production pathway (producer), whereas white cells indicate the absence of biosynthetic pathway (auxotrophy), carbohydrate utilization (non-utilizer), or SCFA fermentation pathway (non-producer).

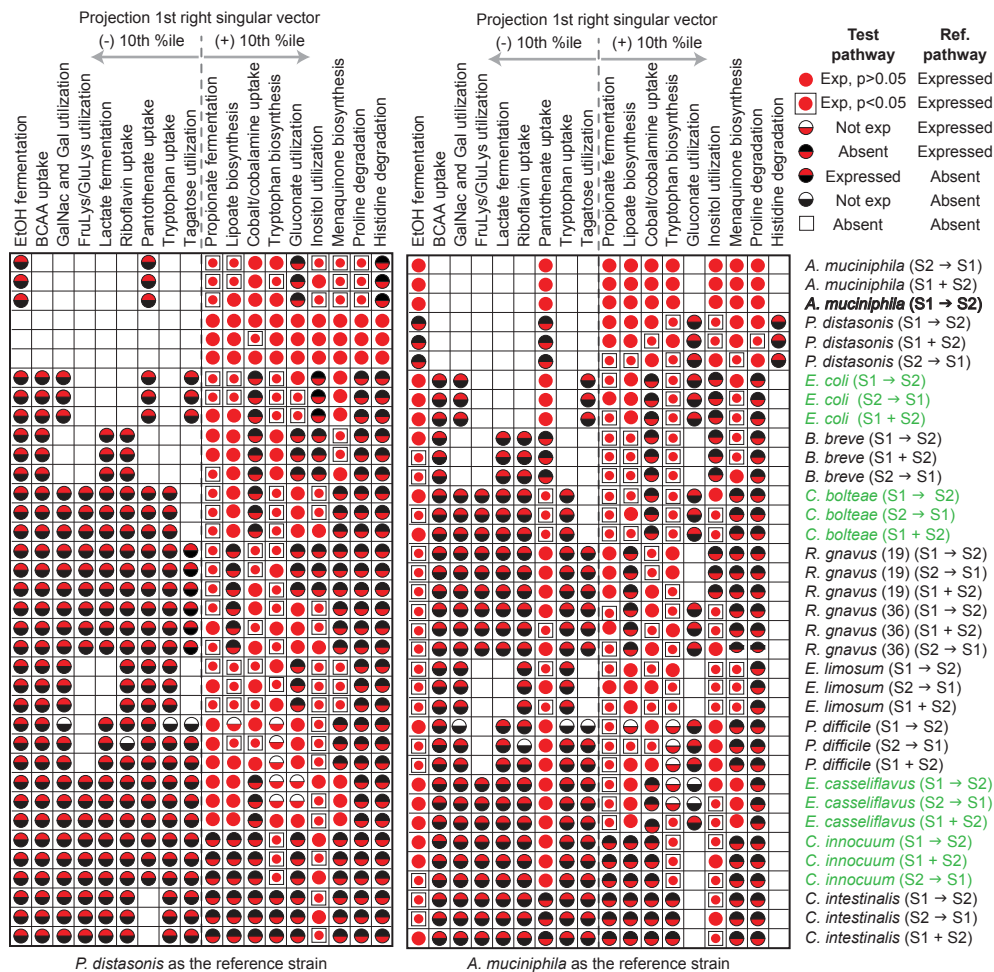

**Fig. S5 – Comparing the expression patterns of metabolic pathways within S1 and S2 organisms using *Akkermansia muciniphila* as the reference S1 strain instead of *Parabacteroides distasonis*. See legend to **Fig. 3D** for definition of symbols.**

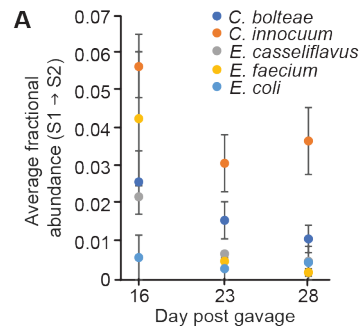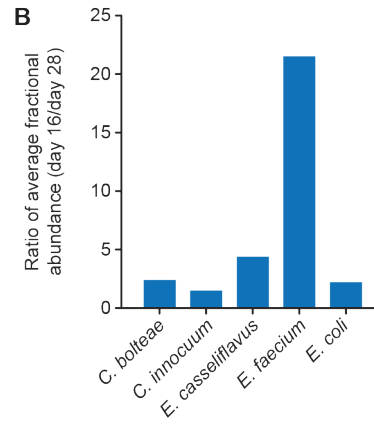

**Fig. S6 – Fitness of the S1 consortium members *C. bolteae*, *C. innocuum*, *E. casseliflavus*, *E. coli* and *E. faecium* from dpg 16 to 28 in the S1→S2 colonization sequence. (A) Average fractional representation. Closed circles and vertical bars represent mean values  $\pm$  SD. (B) Ratio of average fractional representation at dpg 16 compared to dpg 28 (see **Dataset S3A** for the complete time-course).**

## **Supplemental Datasets**

**Dataset S1 - Information about the infant donor from whom the culture collection was generated.**

**Dataset S2 - Strains in S1 and S2 consortia and media used for their growth *in vitro*.**

**Dataset S3 - COPRO-Seq data of fractional abundances of each organism in each mouse used to generate the results shown in Fig. 1 and fig. S1.**

**Dataset S4 - Cecal analyte concentrations in mice belonging to the various treatment groups depicted in fig. S2 and fig.S3.**

**Dataset S5 - Genome annotations of S1 and S2 bacterial strains introduced into gnotobiotic mice, corresponding TPM-normalized transcript data generated under each of the indicated colonization conditions, and correlation between transcriptional and organism abundance.**

**Dataset S6 – Data related to mcSEED metabolic pathway/module relative expression matrix and corresponding eigendecomposition for data shown in Fig. 2B.**

**Dataset S7 – Relationship between position along PC1 of Fig. 2B,C and bacterial fitness on dpG 28 as a function of changing the reference colonization condition for computing the mcSEED relative expression matrix.**

**Dataset S8 - SVD of the mcSEED relative expression matrix presented in Dataset S6 and Fig. 3C.**

**Dataset S9 – Results of statistical analysis of differences in mcSEED pathway expression related to Fig. 3D.**

**Dataset S10 – Results of statistical analysis of differences in mcSEED pathway expression related to Fig. 3D, compared to *Akkermansia muciniphila*.**

**Dataset S11 – Data analysis related to Fig. 4.**

**Dataset S12 – Microbial RNA-Seq count statistics for *E. faecium*.**

**Dataset S13 – Results of statistical analysis of differences in mcSEED pathway expression related to Fig. 4E.**
